# Supplementary material
Source: publisher figshare collection journal article supplement (https://sage.figshare.com/ndownloader/files/17282612)
Supplement: Supplementary file 1 [file 17282612]

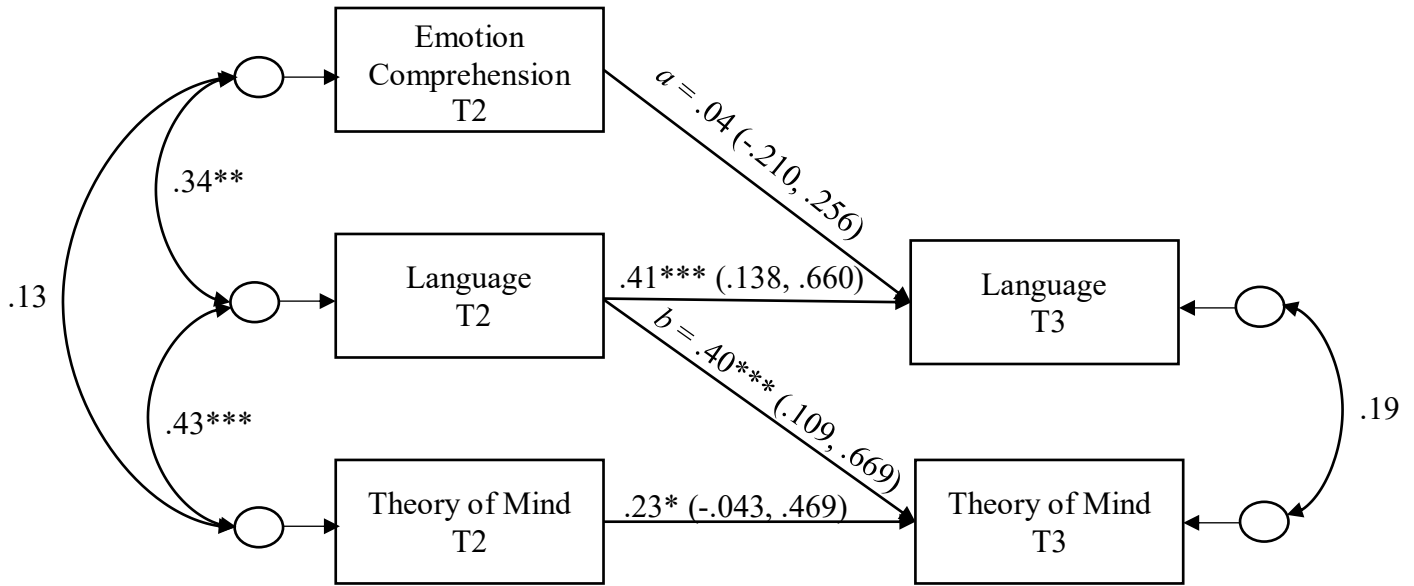

*Supplementary Figure 2.* Half-longitudinal Mediation model for testing the mediation role of Language between Emotion Comprehension at Time 2 (T2) and Theory of Mind at Time 3 (T3) (N = 100).  $a$  is the effect of Emotion Comprehension (predictor) on Language (mediator) from T2 to T3,  $b$  is the effect of Language (mediator) on Theory of Mind (outcome) from T2 to T3. Model fit:  $\chi^2(2) = 4.76; p = .09$ ; CFI = .948; RMSEA = .123. Indirect effect ( $ab$ ) = .01;  $p = .887$ ; 95% CI: -.188, .231. Values are standardized coefficients. Parenthetical values are confidence intervals (95%) of the path weights. \*  $p < .05$ ; \*\*  $p < .01$ ; \*\*\*  $p < .001$ .
